# Supplementary material for: Effects of Income and Price on Household’s Charcoal Consumption in Three Cities of Tanzania
Source: Hindawi journal article supplement (doi:10.1155/2022/9988979), 2022-06-30
Supplement: f1 [file 9988979.f1.docx]

**Household Questionnaire for Assessing Charcoal Consumption in Dodoma, Morogoro and Mtwara Urban Centers**

**SECTION A. GENERAL INFORMATION**

1. Name of interviewer……………………………… 2. Date of interview……………..…..

3. Street……………………4. Ward…………………. 5. Town/district/city…………………

6. Household category

| Category | Tick [ ✓ ] |
| --- | --- |
| High income |  |
| Middle income |  |
| Low income |  |

**SECTION B. SOCIO-ECONOMIC CHARACTERISTICS OF THE HOUSEHOLD**

7. Age of respondent…………………8. Sex of respondent [ ✓ ] 1. Male [ ] 2. Female [ ]

9. Highest education of the respondent [ ✓ ]

1. Primary education [ ] 2. Secondary education [ ] 3. Tertiary education [ ]

4. Informal education [ ] 5. Others (specify)…………………………………….

10. Highest education in the household [ ✓ ]

1. Primary education [ ] 2. Secondary education [ ] 3. Tertiary education [ ]

4. Informal education [ ] 5. Others (specify)…………………………………….

11. Household head: [ ✓ ]

1. Male headed [ ] 2. Female headed [ ]

12. Relation of respondent to household head [ ✓ ]

1. Him/herself [ ] 2. Wife/Husband [ ] 3. Son [ ] 4. Daughter [ ] 5. Others (Specify)

13. Marital status of the household head

1. Single [ ] 2. Married [ ] 3. Divorced [ ] 4. Widow/Widower [ ]

5. Others (specify)…………………………………

14. Household size and Composition …………………….........................................................

0 – 5 Years…….. 6 – 13 Years……. 14 – 30 Years……… 30 Years and above……......

15. Main occupation (s) for the head of household…………………………………………... ……………………………………………………………….……………………………

16. Household monthly/daily income (TZS)……….…………………………. …………

**SECTION C. HOUSEHOLD CHARCOAL CONSUMPTION**

17. Do you use charcoal in your household? [ ✓ ] 1. Yes [ ] 2. No [ ]

If the answer in 17 above is **NO** give reason(s) if **YES** continue with 18

...............................................................................................................................................

18. What are the main use(s) of charcoal in the household?

1. Cooking food for household [ ] 2. Boiling water for drinking [ ]

3. For ironing [ ] 4. Others (specify)…………………………………………….

19. What type of cooking stove do you use in your household? **[ ✓ ]**

1. Common cooking stove (jiko) [ ] 2. Improved charcoal stove (energy serving) [ ]

3. Modern gas cooker [ ] 4. Electricity [ ] 5. Others (specify)……………

20. Quantity of charcoal purchased or used in the household

| **Unit of charcoal purchased at household** | **Purchasing Frequency** | **Purchasing Price per Unit** | **Annual Quantity of Charcoal Used** | **Annual Expenditure on Charcoal** |
| --- | --- | --- | --- | --- |
| Bag (Kg) |  |  |  |  |
| Large tin (Debe) (Kg) |  |  |  |  |
| Small tin (Kopo) (Kg) |  |  |  |  |
| Others (specify) |  |  |  |  |
|  |  |  |  |  |

**Key**: Frequency = Daily, Weekly, Monthly, Others

21. Do you know the main source (s) or tree species of charcoal you are using? [ ✓ ]

1. Yes [ ] 2. No [ ]

If the answer in 21 above is YES mention them………………………………………………….

22. Quantity of tree species used

| Tree species | Quantity Purchased or Used |
| --- | --- |
|  |  |
|  |  |
|  |  |

23. Do you have any preference from a certain species/source? [ ✓ ]

1. Yes [ ] 2. No [ ]

If the answer in 23 above is YES give reasons and the name of the species you prefer…….….

…………………………………………………………………..………………………………

24. Does the supply of charcoal change overtime? 1. Yes [ ] 2. No [ ]

| Change in Supply of Charcoal for the Past 10 Years | | | Give the **Reasons** for Increase or Decrease in Charcoal Supply Overtime |
| --- | --- | --- | --- |
| **Increase** | **Decrease** | **No change** |
|  |  |  |  |

25. Did the price of charcoal changes in the past ten years? 1. Yes [ ] 2. No [ ]

| Change in price of charcoal for the past 10 years | | | Give Reasons | Price of Charcoal | |
| --- | --- | --- | --- | --- | --- |
| **Increase** | **Decrease** | **No change** | **2012** | **2015** |
|  |  |  |  |  |  |

26. Does charcoal from different tree species or places fetch different prices?

1. Yes [ ] 2. No [ ]

27. Which one normally fetches the highest prices?……………………………………………

28. Comparing to other energy sources, is the price of charcoal low, high or the same?............ ………….…………………………………………….................................................................

29. What challenges are associated with charcoal use in your household?

……………………………………………………………………………………………………………………………………………………………………………………………………

**SECTION D. OTHER TYPES OF ENERGY USED IN THE HOUSEHOLD**

30. Do you use other sources of energy other than charcoal for household uses? [ ✓ ]

1. Yes [ ] 2. No [ ]

If **Yes** why? ………………… ………………… ………………… …………………

31. Mention the other sources of energy, which you would have used in the absence of Charcoal.

………………… ………………… ………………… …………………

32. Other sources of energy used in the Household apart from charcoal?

| **Sources of Energy** | **Purchasing Frequency** | **Price per Unit** | **Annual Quantity Purchased** |
| --- | --- | --- | --- |
| Firewood |  |  |  |
| Gas |  |  |  |
| Kerosene |  |  |  |
| Electricity |  |  |  |
| Others (specify)… |  |  |  |

**Key**: Frequency = Daily, Weekly, Monthly, Others

33. Do you have specific uses(s) for each type of energy source?

1. Yes [ ] 2. No [ ]

34. What are the main use(s) for each type of energy source in the household?

| **Energy Source** | **Main Uses: 1. Cooking 2. Boiling water 3. Ironing 4. Others** |
| --- | --- |
| Firewood |  |
| Gas |  |
| Kerosene |  |
| Electricity |  |
| Others |  |

35. Why do you have to use different energy sources for different activities?........................... ………………………………………..…………………………………………………………

36. What challenges are associated with the use of other type of energy source(s) used in the household?..........…………………………………………………...…………………………………………………………………………………………………………………….

37. On average, what is the monthly total expenditure of your household for all the consumptions such as food, energy, transport, school fees and other social activities?....................................

***THANKS FOR YOUR COOPERATION***
